# Supplementary material for: Gait variability during abrupt slow and fast speed transitions in older adults with mild cognitive impairment
Source: PubMed Central journal article supplement (PMC9586342; doi:10.1371/journal.pone.0276658), 2022-10-21
Supplement: pone.0276658.s001.pdf [file pone.0276658.s001.pdf]

| ID        | Group | Variability of Spatiotemporal Parameters |            |           |            |                              |            |           |            |                              |               |                |                  | Means of Spatiotemporal Parameters |               |                |                         |                              |                         |                              |       | Gait Speed Before and After the Transition Phases |  |  |  |
|-----------|-------|------------------------------------------|------------|-----------|------------|------------------------------|------------|-----------|------------|------------------------------|---------------|----------------|------------------|------------------------------------|---------------|----------------|-------------------------|------------------------------|-------------------------|------------------------------|-------|---------------------------------------------------|--|--|--|
|           |       | Slow to Fast Speed Condition             |            |           |            | Fast to Slow Speed Condition |            |           |            | Slow to Fast Speed Condition |               |                |                  | Fast to Slow Speed Condition       |               |                |                         | Slow to Fast Speed Condition |                         | Fast to Slow Speed Condition |       |                                                   |  |  |  |
|           |       | Step length                              | Step width | Step time | Swing time | Step length                  | Step width | Step time | Swing time | Step length (cm)             | Step time (s) | Swing time (s) | Step length (cm) | Step width (cm)                    | Step time (s) | Swing time (s) | Initial Slow Pace (m/s) | Reaching Fast Speed (m/s)    | Initial Fast Pace (m/s) | Reaching Slow Speed (m/s)    |       |                                                   |  |  |  |
| Control01 | 1     | 8.592                                    | 47.393     | 15.031    | 15.595     | 12.595                       | 35.721     | 12.074    | 10.357     | 68.225                       | 4.787         | 0.491          | 0.383            | 64.488                             | 4.323         | 0.473          | 0.373                   | 0.847                        | 1.782                   | 1.862                        | 1.039 |                                                   |  |  |  |
| Control02 | 1     | 10.444                                   | 28.947     | 12.494    | 20.372     | 10.987                       | 22.944     | 4.831     | 12.340     | 54.960                       | 7.286         | 0.460          | 0.378            | 58.080                             | 7.583         | 0.426          | 0.446                   | 0.825                        | 1.685                   | 1.752                        | 1.039 |                                                   |  |  |  |
| Control03 | 1     | 14.503                                   | 29.640     | 19.406    | 13.226     | 11.476                       | 35.170     | 17.888    | 10.143     | 77.692                       | 11.635        | 0.501          | 0.410            | 79.626                             | 11.241        | 0.482          | 0.404                   | 0.783                        | 2.354                   | 2.344                        | 1.063 |                                                   |  |  |  |
| Control04 | 1     | 9.063                                    | 22.381     | 14.607    | 18.046     | 15.767                       | 45.004     | 10.477    | 11.925     | 66.619                       | 10.383        | 0.459          | 0.410            | 68.387                             | 12.232        | 0.474          | 0.431                   | 1.087                        | 1.956                   | 1.968                        | 1.004 |                                                   |  |  |  |
| Control05 | 1     | 10.369                                   | 22.111     | 10.803    | 17.229     | 8.442                        | 31.225     | 10.651    | 7.163      | 62.178                       | 8.813         | 0.594          | 0.450            | 62.869                             | 8.711         | 0.459          | 0.438                   | 0.807                        | 1.631                   | 1.717                        | 0.980 |                                                   |  |  |  |
| Control06 | 1     | 11.705                                   | 31.209     | 13.997    | 14.968     | 12.426                       | 40.206     | 12.513    | 11.766     | 55.144                       | 6.707         | 0.567          | 0.447            | 59.219                             | 8.413         | 0.345          | 0.470                   | 0.668                        | 1.467                   | 1.663                        | 0.710 |                                                   |  |  |  |
| Control07 | 1     | 10.974                                   | 47.431     | 10.566    | 10.458     | 10.460                       | 54.057     | 8.809     | 15.114     | 54.864                       | 3.391         | 0.449          | 0.488            | 53.253                             | 4.178         | 0.542          | 0.588                   | 0.667                        | 1.372                   | 1.409                        | 0.753 |                                                   |  |  |  |
| Control08 | 1     | 10.041                                   | 48.770     | 10.473    | 9.617      | 10.828                       | 48.575     | 13.660    | 9.639      | 56.422                       | 5.761         | 0.529          | 0.472            | 55.409                             | 5.948         | 0.541          | 0.404                   | 0.548                        | 1.420                   | 1.370                        | 0.720 |                                                   |  |  |  |
| Control09 | 1     | 10.205                                   | 41.982     | 16.988    | 22.978     | 7.283                        | 32.794     | 12.407    | 12.200     | 68.641                       | 7.104         | 0.531          | 0.464            | 66.452                             | 7.285         | 0.533          | 0.479                   | 0.915                        | 1.573                   | 1.642                        | 0.876 |                                                   |  |  |  |
| Control10 | 1     | 8.723                                    | 27.788     | 10.290    | 9.739      | 8.390                        | 35.721     | 8.753     | 10.225     | 73.432                       | 6.177         | 0.563          | 0.512            | 68.897                             | 6.378         | 0.581          | 0.539                   | 0.880                        | 1.710                   | 1.726                        | 0.767 |                                                   |  |  |  |
| Control11 | 1     | 7.052                                    | 23.290     | 13.453    | 9.115      | 6.579                        | 20.859     | 7.024     | 7.430      | 65.088                       | 11.652        | 0.586          | 0.422            | 59.347                             | 14.012        | 0.506          | 0.442                   | 0.844                        | 1.703                   | 1.631                        | 0.854 |                                                   |  |  |  |
| Control12 | 1     | 15.509                                   | 21.293     | 17.838    | 11.762     | 13.953                       | 28.652     | 9.482     | 9.098      | 56.353                       | 10.956        | 0.548          | 0.454            | 52.295                             | 11.072        | 0.520          | 0.454                   | 0.680                        | 1.295                   | 1.319                        | 0.684 |                                                   |  |  |  |
| Control13 | 1     | 17.092                                   | 52.983     | 18.735    | 12.510     | 15.272                       | 46.559     | 10.928    | 10.647     | 60.940                       | 6.872         | 0.486          | 0.481            | 60.912                             | 6.688         | 0.464          | 0.461                   | 0.793                        | 1.737                   | 1.819                        | 0.901 |                                                   |  |  |  |
| Control14 | 1     | 7.137                                    | 41.835     | 15.347    | 15.783     | 16.478                       | 36.432     | 7.837     | 9.372      | 58.586                       | 5.470         | 0.472          | 0.407            | 55.035                             | 6.486         | 0.576          | 0.417                   | 0.915                        | 1.689                   | 1.634                        | 0.871 |                                                   |  |  |  |
| Control15 | 1     | 13.349                                   | 28.599     | 13.605    | 18.723     | 12.611                       | 23.461     | 10.443    | 17.445     | 66.074                       | 10.072        | 0.519          | 0.557            | 59.650                             | 11.406        | 0.538          | 0.483                   | 0.674                        | 1.763                   | 1.701                        | 0.729 |                                                   |  |  |  |
| Control16 | 1     | 4.250                                    | 32.535     | 8.981     | 7.724      | 6.250                        | 35.721     | 5.470     | 5.014      | 46.216                       | 4.232         | 0.492          | 0.459            | 44.947                             | 4.837         | 0.482          | 0.438                   | 0.743                        | 1.205                   | 1.247                        | 0.750 |                                                   |  |  |  |
| Control17 | 1     | 7.522                                    | 37.771     | 12.029    | 10.541     | 10.577                       | 26.429     | 10.820    | 9.984      | 63.692                       | 6.963         | 0.520          | 0.481            | 60.222                             | 6.192         | 0.524          | 0.489                   | 0.919                        | 1.638                   | 1.622                        | 0.802 |                                                   |  |  |  |
| Control18 | 1     | 10.166                                   | 57.219     | 13.571    | 8.743      | 10.041                       | 20.102     | 17.689    | 12.218     | 64.537                       | 4.299         | 0.538          | 0.484            | 63.081                             | 5.280         | 0.539          | 0.491                   | 0.686                        | 1.656                   | 1.731                        | 0.724 |                                                   |  |  |  |
| Control19 | 1     | 10.837                                   | 33.302     | 9.147     | 7.569      | 15.196                       | 43.730     | 7.994     | 7.529      | 69.527                       | 5.571         | 0.496          | 0.438            | 64.767                             | 7.249         | 0.469          | 0.425                   | 1.031                        | 1.881                   | 1.913                        | 0.951 |                                                   |  |  |  |
| Control20 | 1     | 8.540                                    | 32.449     | 11.366    | 7.574      | 9.281                        | 29.191     | 8.664     | 5.214      | 69.314                       | 7.398         | 0.566          | 0.481            | 64.003                             | 7.684         | 0.551          | 0.492                   | 0.849                        | 1.704                   | 1.686                        | 0.828 |                                                   |  |  |  |
| Control21 | 1     | 9.144                                    | 20.577     | 16.586    | 20.375     | 13.100                       | 10.200     | 12.749    | 12.340     | 61.422                       | 7.741         | 0.511          | 0.462            | 59.654                             | 10.531        | 0.502          | 0.483                   | 0.941                        | 1.517                   | 1.703                        | 0.875 |                                                   |  |  |  |
| Control22 | 1     | 11.788                                   | 20.755     | 10.057    | 6.837      | 14.634                       | 14.853     | 12.340    | 57.636     | 12.265                       | 0.519         | 0.465          | 60.768           | 10.832                             | 0.467         | 0.479          | 0.479                   | 1.487                        | 1.608                   | 0.831                        |       |                                                   |  |  |  |
| Control23 | 1     | 10.096                                   | 32.656     | 13.346    | 17.521     | 7.100                        | 28.522     | 8.120     | 11.793     | 67.462                       | 8.555         | 0.524          | 0.488            | 68.712                             | 11.041        | 0.492          | 0.476                   | 0.845                        | 1.890                   | 1.786                        | 1.056 |                                                   |  |  |  |
| Control24 | 1     | 14.390                                   | 34.962     | 13.964    | 17.892     | 15.717                       | 46.970     | 13.221    | 12.340     | 65.081                       | 5.923         | 0.518          | 0.511            | 60.999                             | 6.328         | 0.544          | 0.483                   | 0.927                        | 1.863                   | 1.919                        | 0.735 |                                                   |  |  |  |
| Control25 | 1     | 14.892                                   | 27.005     | 13.954    | 12.151     | 10.265                       | 37.546     | 8.284     | 7.183      | 68.103                       | 8.130         | 0.478          | 0.407            | 73.610                             | 7.974         | 0.447          | 0.395                   | 1.120                        | 1.939                   | 1.989                        | 1.139 |                                                   |  |  |  |
| Means     | 1     | 10.65                                    | 34.10      | 13.78     | 13.53      | 11.12                        | 33.98      | 10.71     | 10.43      | 63.05                        | 7.51          | 0.51           | 0.46             | 61.77                              | 7.96          | 0.50           | 0.46                    | 0.827                        | 1.671                   | 1.701                        | 0.868 |                                                   |  |  |  |
| SD        | 1     | 3.02                                     | 10.38      | 3.07      | 4.52       | 3.15                         | 10.78      | 3.29      | 2.87       | 6.91                         | 2.93          | 0.03           | 0.04             | 7.13                               | 2.76          | 0.04           | 0.04                    | 0.131                        | 0.238                   | 0.227                        | 0.134 |                                                   |  |  |  |
| Max       | 1     | 17.19                                    | 57.22      | 20.76     | 22.98      | 16.48                        | 54.06      | 17.89     | 17.45      | 77.69                        | 12.26         | 0.57           | 0.56             | 79.63                              | 14.01         | 0.58           | 0.54                    | 0.927                        | 2.544                   | 2.544                        | 1.139 |                                                   |  |  |  |
| Min       | 1     | 4.25                                     | 19.20      | 8.98      | 7.67       | 6.25                         | 14.63      | 4.83      | 5.01       | 46.22                        | 3.39          | 0.46           | 0.38             | 44.95                              | 4.18          | 0.43           | 0.37                    | 0.606                        | 1.205                   | 1.247                        | 0.684 |                                                   |  |  |  |
| MC101     | 2     | 12.813                                   | 37.589     | 12.309    | 11.117     | 15.262                       | 33.122     | 11.022    | 7.744      | 70.698                       | 6.239         | 0.541          | 0.477            | 66.556                             | 11.134        | 0.526          | 0.460                   | 0.934                        | 1.998                   | 1.914                        | 0.962 |                                                   |  |  |  |
| MC102     | 2     | 7.034                                    | 33.987     | 8.408     | 8.292      | 6.395                        | 11.773     | 14.073    | 23.983     | 69.889                       | 10.948        | 0.506          | 0.445            | 65.653                             | 13.062        | 0.463          | 0.464                   | 0.892                        | 1.796                   | 1.676                        | 0.969 |                                                   |  |  |  |
| MC103     | 2     | 9.259                                    | 36.589     | 17.874    | 18.739     | 9.323                        | 39.815     | 14.526    | 11.805     | 80.161                       | 1.819         | 0.526          | 0.482            | 75.698                             | 6.535         | 0.541          | 0.510                   | 0.824                        | 2.096                   | 2.096                        | 0.896 |                                                   |  |  |  |
| MC104     | 2     | 4.886                                    | 31.859     | 11.931    | 10.045     | 10.859                       | 45.470     | 8.901     | 14.280     | 72.402                       | 5.766         | 0.458          | 0.395            | 69.094                             | 8.071         | 0.432          | 0.365                   | 1.323                        | 2.209                   | 2.082                        | 1.120 |                                                   |  |  |  |
| MC105     | 2     | 4.276                                    | 49.598     | 14.398    | 17.620     | 15.807                       | 47.282     | 7.656     | 7.315      | 69.891                       | 4.251         | 0.529          | 0.466            | 64.822                             | 5.646         | 0.500          | 0.448                   | 0.852                        | 1.677                   | 1.726                        | 0.908 |                                                   |  |  |  |
| MC106     | 2     | 5.804                                    | 27.134     | 11.520    | 11.752     | 8.679                        | 49.925     | 5.492     | 5.603      | 56.602                       | 5.621         | 0.445          | 0.414            | 56.177                             | 6.012         | 0.467          | 0.414                   | 0.940                        | 1.549                   | 1.575                        | 1.018 |                                                   |  |  |  |
| MC107     | 2     | 14.433                                   | 28.673     | 10.344    | 7.562      | 18.744                       | 34.185     | 7.009     | 4.925      | 49.050                       | 9.624         | 0.460          | 0.427            | 48.095                             | 9.015         | 0.444          | 0.404                   | 0.814                        | 1.538                   | 1.619                        | 0.740 |                                                   |  |  |  |
| MC108     | 2     | 11.036                                   | 35.316     | 11.154    | 9.145      | 21.952                       | 30.946     | 9.913     | 13.810     | 49.748                       | 7.327         | 0.489          | 0.436            | 50.443                             | 7.064         | 0.452          | 0.426                   | 0.680                        | 1.300                   | 1.439                        | 0.743 |                                                   |  |  |  |
| MC109     | 2     | 11.698                                   | 45.215     | 8.248     | 13.470     | 21.201                       | 38.967     | 10.482    | 19.908     | 52.070                       | 4.919         | 0.468          | 0.430            | 52.753                             | 6.401         | 0.476          | 0.451                   | 0.872                        | 1.445                   | 1.424                        | 0.783 |                                                   |  |  |  |
| MC110     | 2     | 21.639                                   | 36.234     | 16.119    | 13.941     | 15.045                       | 48.219     | 10.545    | 20.789     | 51.623                       | 7.392         | 0.506          | 0.512            | 41.374                             | 8.876         | 0.451          | 0.478                   | 0.756                        | 1.423                   | 1.374                        | 0.564 |                                                   |  |  |  |
| MC111     | 2     | 17.115                                   | 25.220     | 12.990    | 14.620     | 25.055                       | 34.942     | 13.410    | 9.632      | 63.985                       | 9.254         | 0.478          | 0.458            | 52.491                             | 9.318         | 0.483          | 0.455                   | 0.665                        | 1.926                   | 1.609                        | 0.678 |                                                   |  |  |  |
| MC112     | 2     | 9.887                                    | 43.521     | 9.835     | 7.754      | 11.351                       | 24.132     | 7.318     | 17.071     | 61.985                       | 9.386         | 0.506          | 0.470            | 57.605                             | 10.278        | 0.468          | 0.481                   | 0.811                        | 1.558                   | 1.580                        | 0.878 |                                                   |  |  |  |
| MC113     | 2     | 10.013                                   | 48.974     | 6.490     | 27.464     | 15.396                       | 33.316     | 5.775     | 26.338     | 53.204                       | 7.116         | 0.503          | 0.468            | 55.518                             | 6.326         | 0.462          | 0.460                   | 0.907                        | 1.464                   | 1.501                        | 0.788 |                                                   |  |  |  |
| MC114     | 2     | 5.096                                    | 24.627     | 14.049    | 8.630      | 18.380                       | 26.759     | 11.961    | 6.790      | 72.452                       | 7.425         | 0.587          | 0.508            | 52.382                             | 8.572         | 0.490          | 0.494                   | 0.593                        | 1.542                   | 1.529                        | 0.542 |                                                   |  |  |  |
| MC115     | 2     | 7.174                                    | 43.754     | 13.078    | 17.379     | 11.922                       | 38.867     | 6.377     | 12.779     | 62.118                       | 4.155         | 0.515          | 0.510            | 58.834                             | 4.204         | 0.498          | 0.494                   | 0.895                        | 1.614                   | 1.586                        | 0.820 |                                                   |  |  |  |
| MC116     | 2     | 8.618                                    | 15.867     | 11.425    | 11.286     | 15.122                       | 33.874     | 4.951     | 6.745      | 47.372                       | 9.716         | 0.551          | 0.510            | 48.433                             | 8.303         | 0.476          | 0.465                   | 0.614                        | 1.131                   | 1.236                        | 0.338 |                                                   |  |  |  |
| MC117     | 2     | 8.164                                    | 52.553     | 10.375    | 9.301      | 8.608                        | 31.361     | 6.275     | 6.480      | 58.502                       | 5.008         | 0.527          | 0.477            | 55.438                             | 7.323         | 0.531          | 0.456                   | 0.791                        | 1.351                   | 1.377                        | 0.763 |                                                   |  |  |  |
| MC118     | 2     | 9.747                                    | 59.746     | 14.232    | 10.170     | 12.074                       | 61.532     | 14.523    | 11.276     | 70.379                       | 6.174         | 0.508          | 0.471            | 70.295                             | 6.145         | 0.520          | 0.512                   | 1.084                        | 2.051                   | 2.058                        | 0.887 |                                                   |  |  |  |
| MC119     | 2     | 10.433                                   | 31.881     | 11.288    | 8.928      | 22.491                       | 38.073     | 8.654     | 18.532     | 69.876                       | 5.285         | 0.437          | 0.447            | 66.621                             | 6.243         | 0.416          | 0.466                   | 0.692                        | 1.190                   | 1.214                        | 1.164 |                                                   |  |  |  |
| MC120     | 2     | 13.945                                   | 29.016     | 12.217    | 18.811     | 12.562                       | 47.038     | 18.011    | 10.056     | 69.873                       | 5.810         | 0.611          | 0.465            | 67.651                             | 6.786         | 0.594          | 0.523                   | 1.615                        | 1.699                   | 1.661                        | 0.800 |                                                   |  |  |  |
| MC121     | 2     | 9.050                                    | 28.848     | 16.920    | 19.726     | 5.681                        | 26.973     | 10.910    | 14.432     | 57.072                       | 9.420         | 0.456          | 0.409            | 60.841                             | 8.508         | 0.484          | 0.430                   | 0.744                        | 1.656                   | 1.554                        | 0.988 |                                                   |  |  |  |
| MC122     | 2     | 8.075                                    | 32.147     | 17.044    | 19.994     | 17.879                       | 58.879     | 7.426     | 22.108     | 57.211                       | 6.710         | 0.555          | 0.486            | 56.072                             | 4.961         | 0.490          | 0.410                   | 0.791                        | 1.536                   | 1.543                        | 0.613 |                                                   |  |  |  |
| MC123     | 2     | 13.818                                   | 52.952     | 23.367    | 28.318     | 4.875                        | 38.367     | 14.989    | 11.546     | 52.945                       | 4.788         | 0.518          | 0.456            | 63.538                             | 4.402         | 0.440          | 0.427                   | 0.679                        | 1.732                   | 1.817                        | 0.984 |                                                   |  |  |  |
| MC124     | 2     | 7.412                                    | 41.246     | 14.799    | 6.421      | 10.168                       | 27.184     | 7.138     | 15.473     | 72.702                       | 6.626         | 0.495          | 0.461            | 68.172                             | 6.986         | 0.524          | 0.472                   | 0.981                        | 1.718                   | 1.779                        |       |                                                   |  |  |  |
